# Supplementary material for: Discovering the potential of S. clavuligerus for bioactive compound production: cross-talk between the chromosome and the pSCL4 megaplasmid
Source: PubMed Central journal article supplement (PMC5702194; doi:10.1186/s12864-017-4289-y), 2017-11-25
Supplement: 12864_2017_4289_MOESM1_ESM.pdf [file 12864_2017_4289_MOESM1_ESM.pdf]

## **Additional file 1**

# **Discovering the potential of *Streptomyces clavuligerus* for bioactive compound production: cross-talk between the chromosome and the pSCL4 megaplasmid**

**Rubén Álvarez-Álvarez\*<sup>1</sup>, Yolanda Martínez-Burgo\*<sup>1</sup>, Antonio Rodríguez-García<sup>1,2</sup>, Paloma Liras<sup>1</sup>**

1) Microbiology Section, Faculty of Biological and Environmental Sciences, University of León, León, Spain. 2) Institute of Biotechnology of León, INBIOTEC, León, Spain.

**\*Authors with equal contributions.**

**Corresponding author: Paloma Liras [paloma.liras@unileon.es](mailto:paloma.liras@unileon.es).**

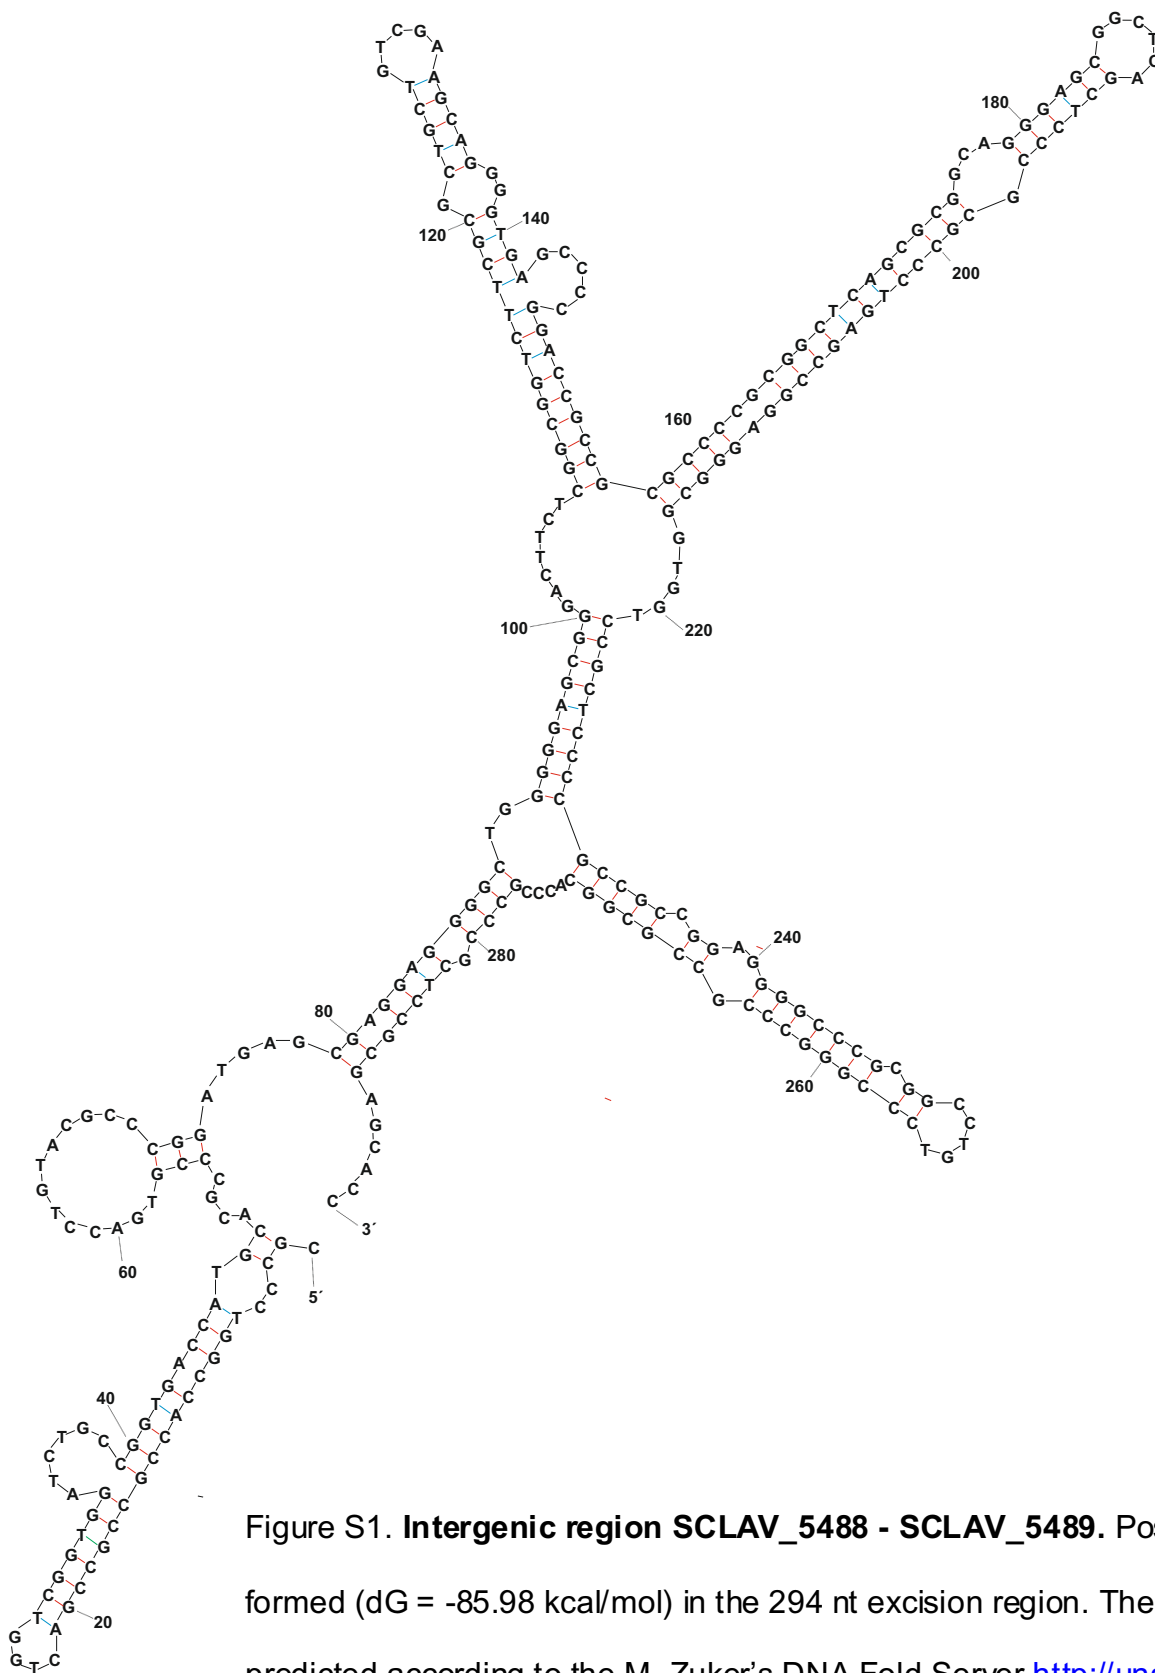

Figure S1. Intergenic region SCLAV\_5488 - SCLAV\_5489. Possible hairpin loc formed ( $dG = -85.98$  kcal/mol) in the 294 nt excision region. The hairpin loop was predicted according to the M. Zuker's DNA Fold Server (<http://unafold.rna.albany.edu/>).

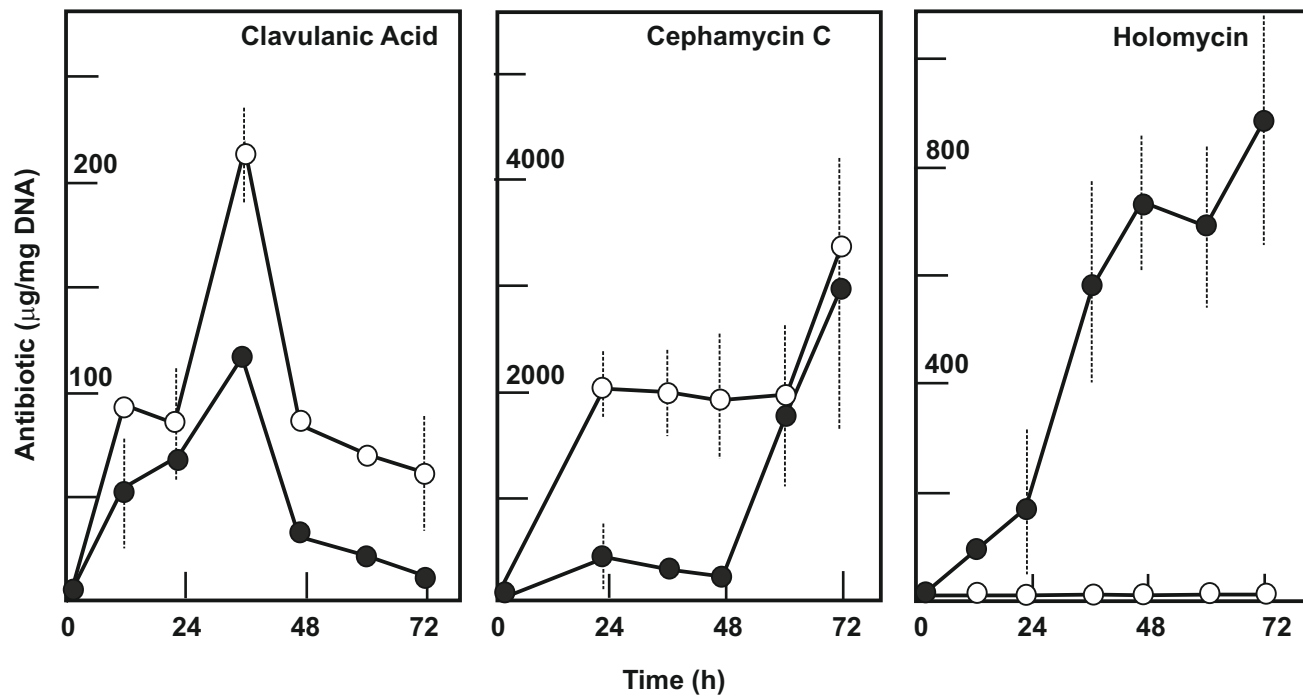

Figure S2. **Antibiotics production.** *S. clavuligerus* ATCC27064 (white circles) and *S. clavuligerus* pSCL4<sup>-</sup> (black circles) were grown in SA medium, and production of clavulanic acid (left panel), cephameycin C (central panel) and holomycin (right panel) was quantified.

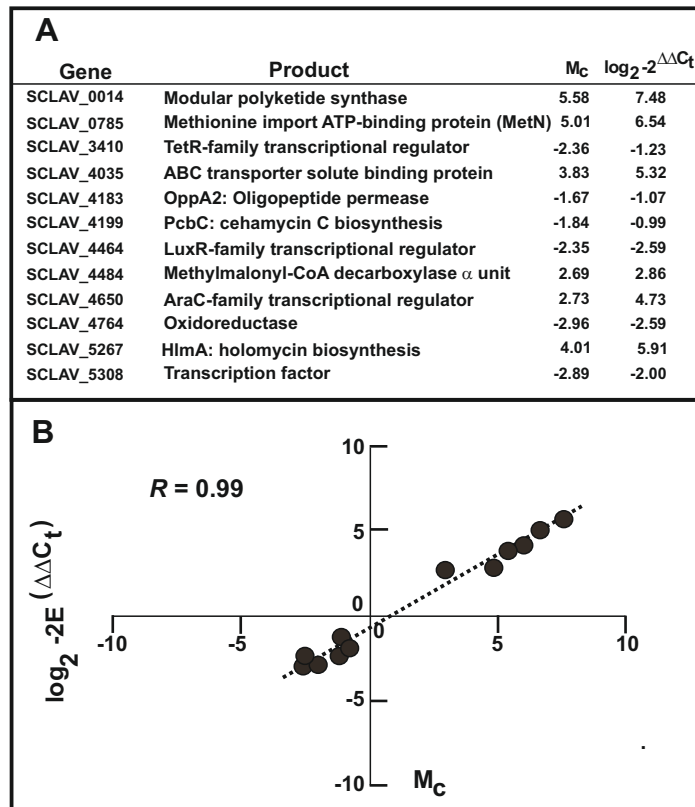

Figure S3. **RT-qPCR validation of the microarray data.** (A) Genes tested: comparison of the data obtained for each gene analyzed in microarrays experiment ( $M_c$  values) and by RT-qPCR [ $\log_2 -2E(\Delta\Delta C_t)$ ]. (B) Representation of the correlation between the results showed in panel A.

Fig. S4

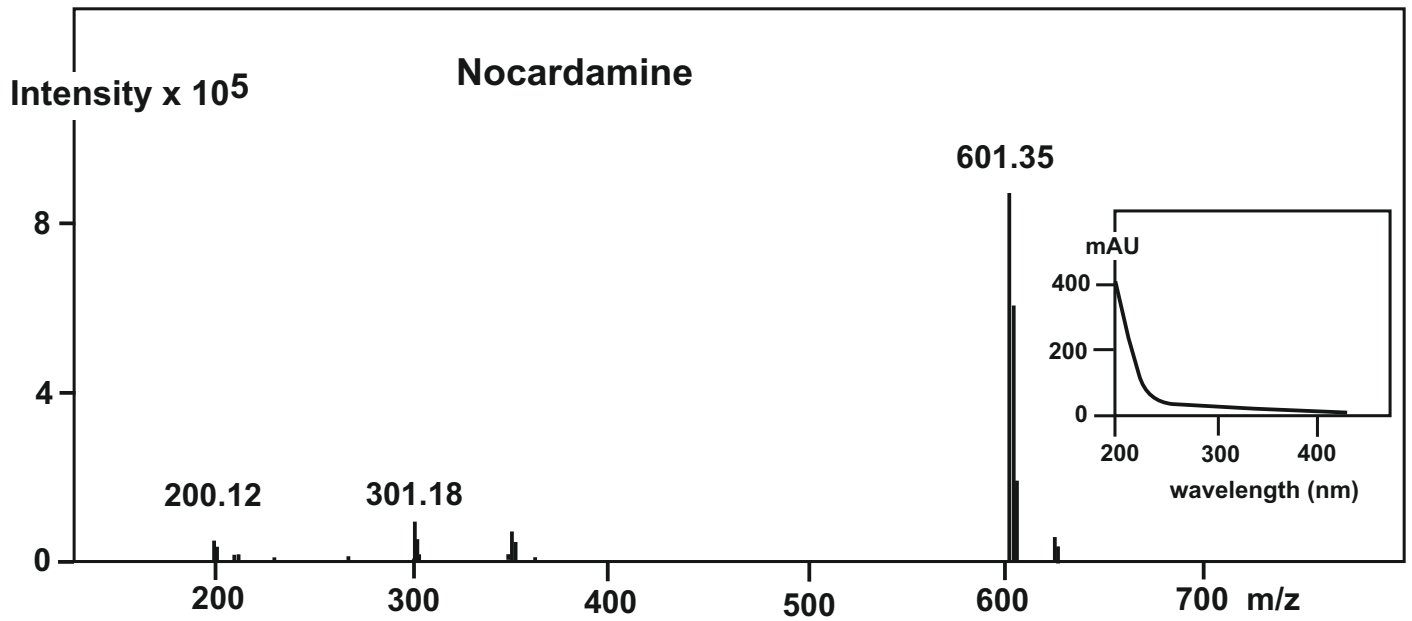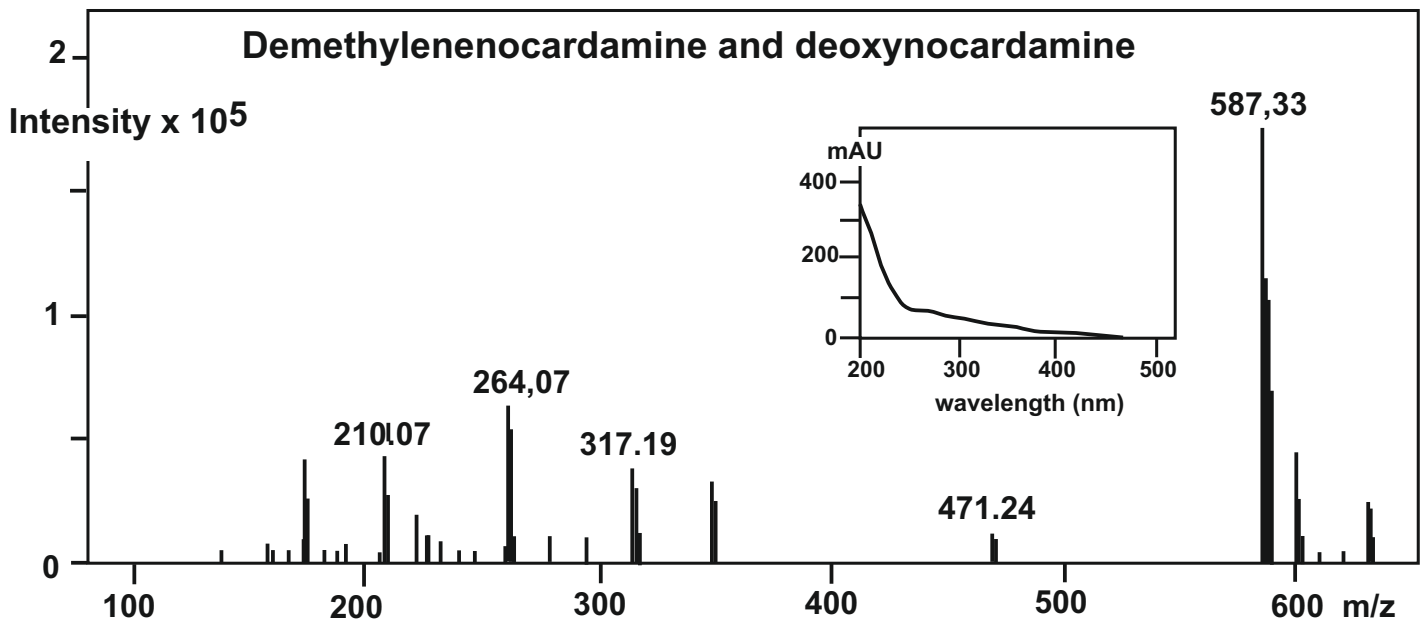

Fig. S4

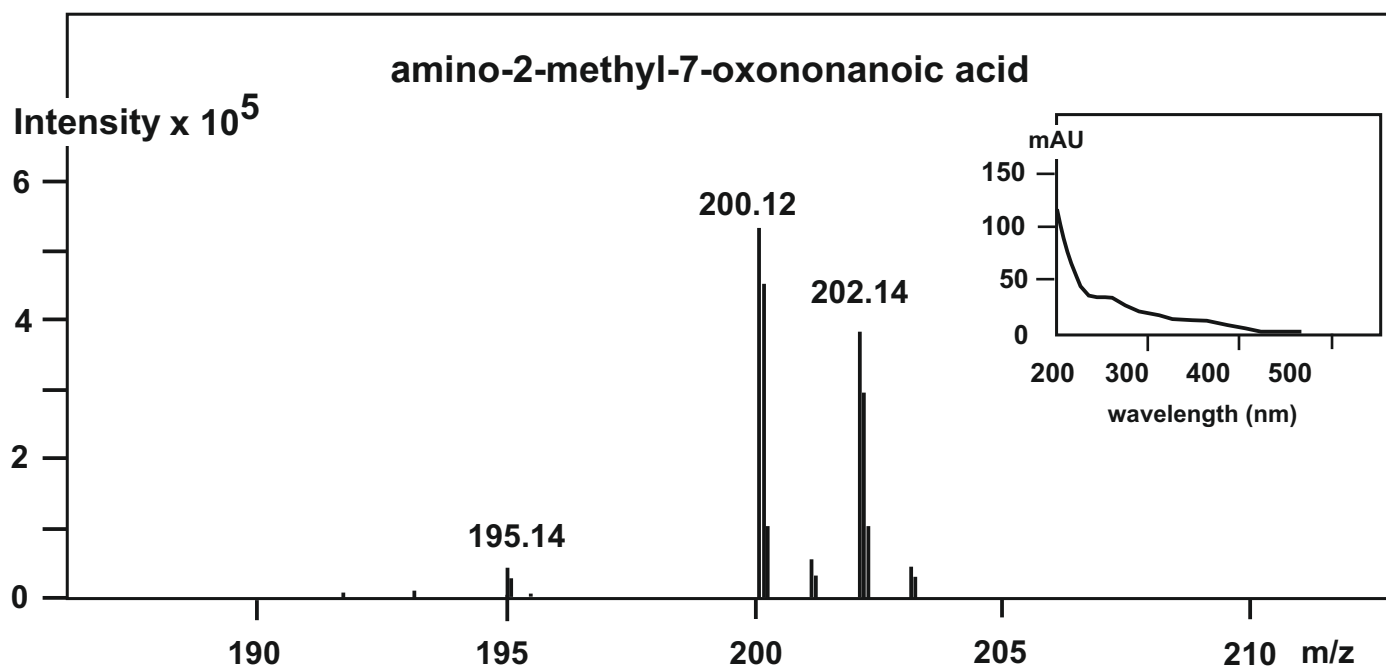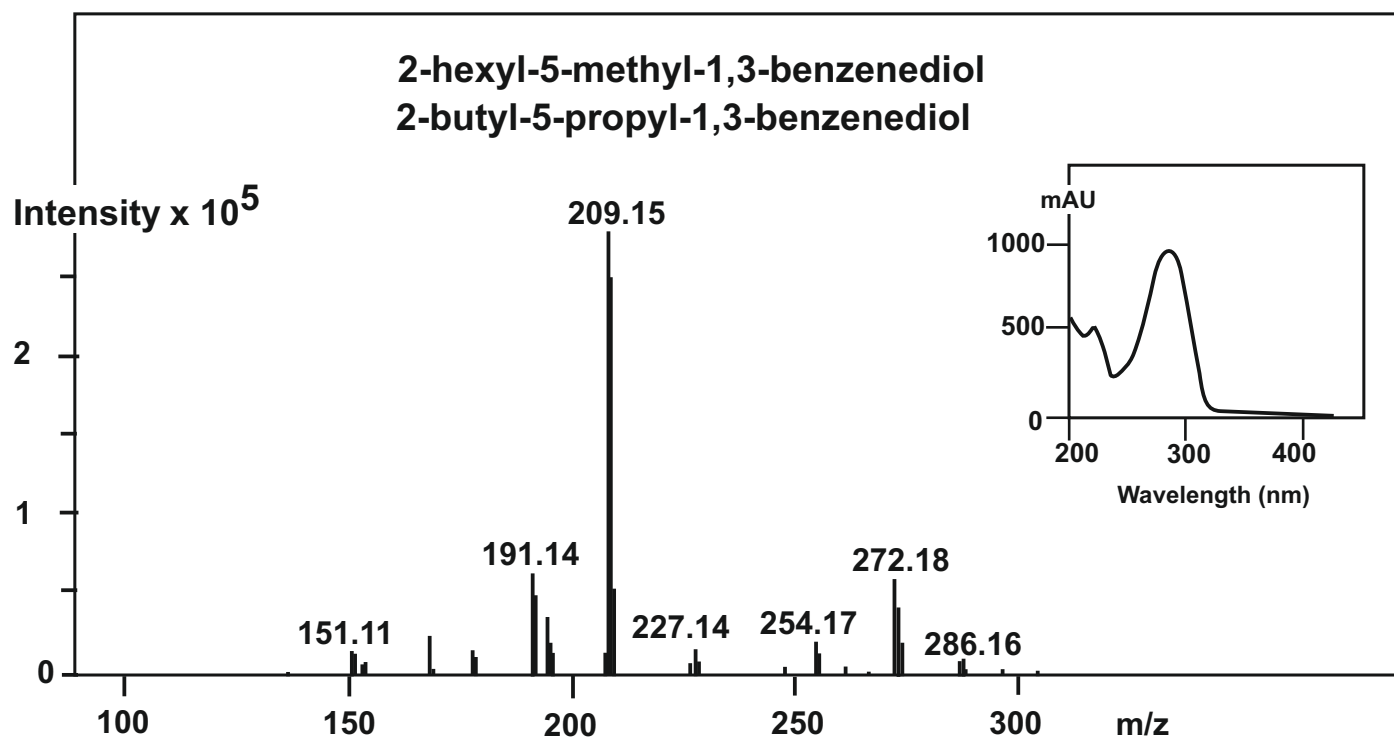

Fig. S4

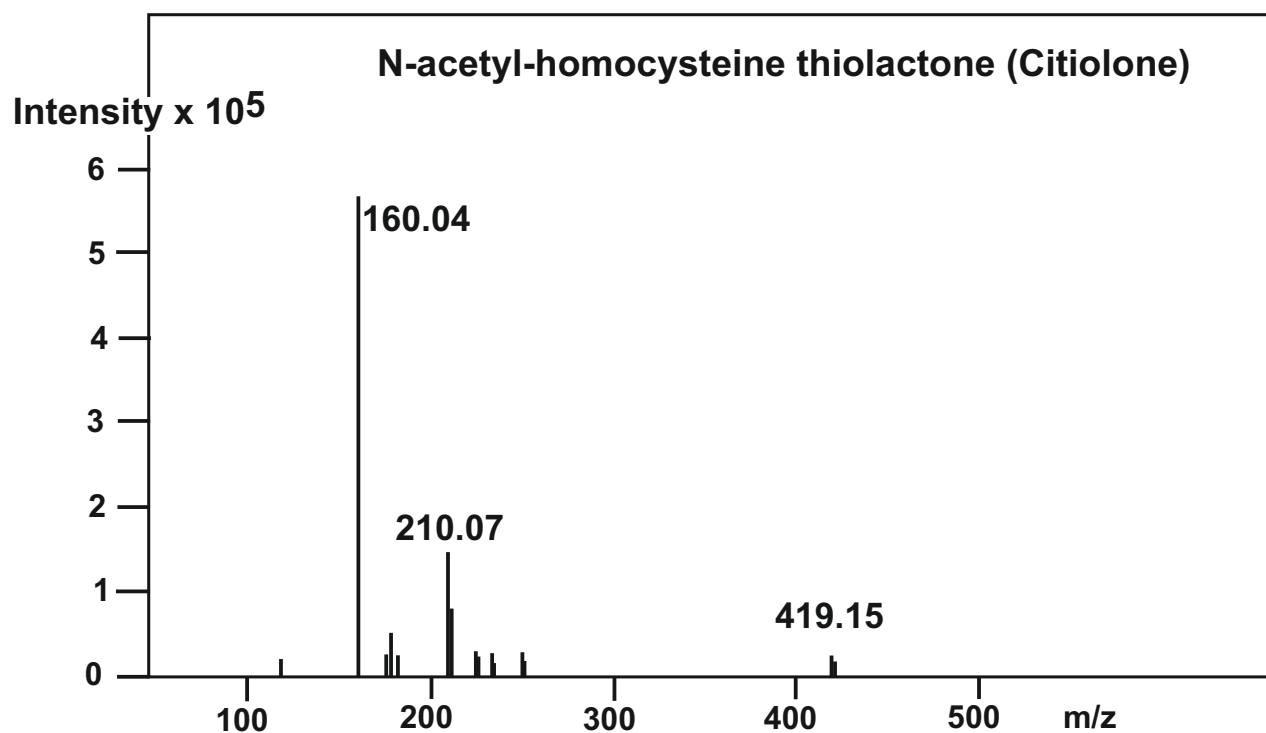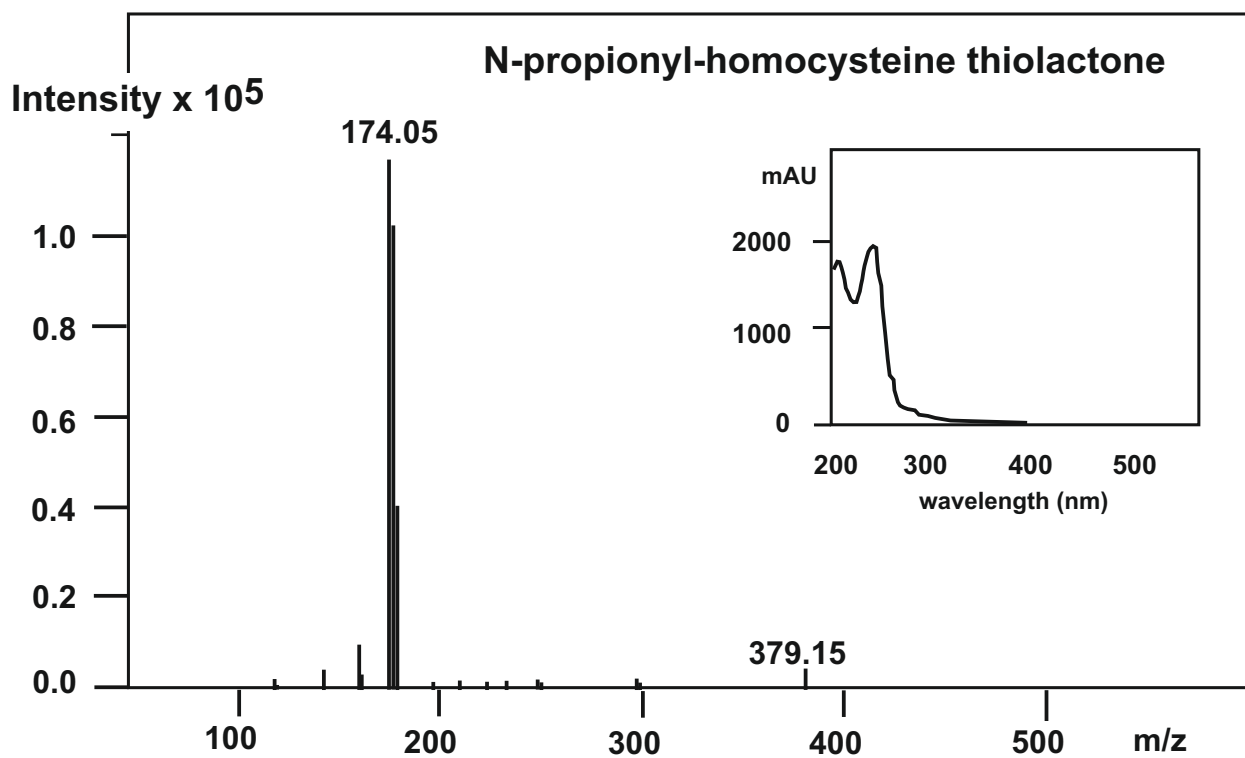

Fig. S4

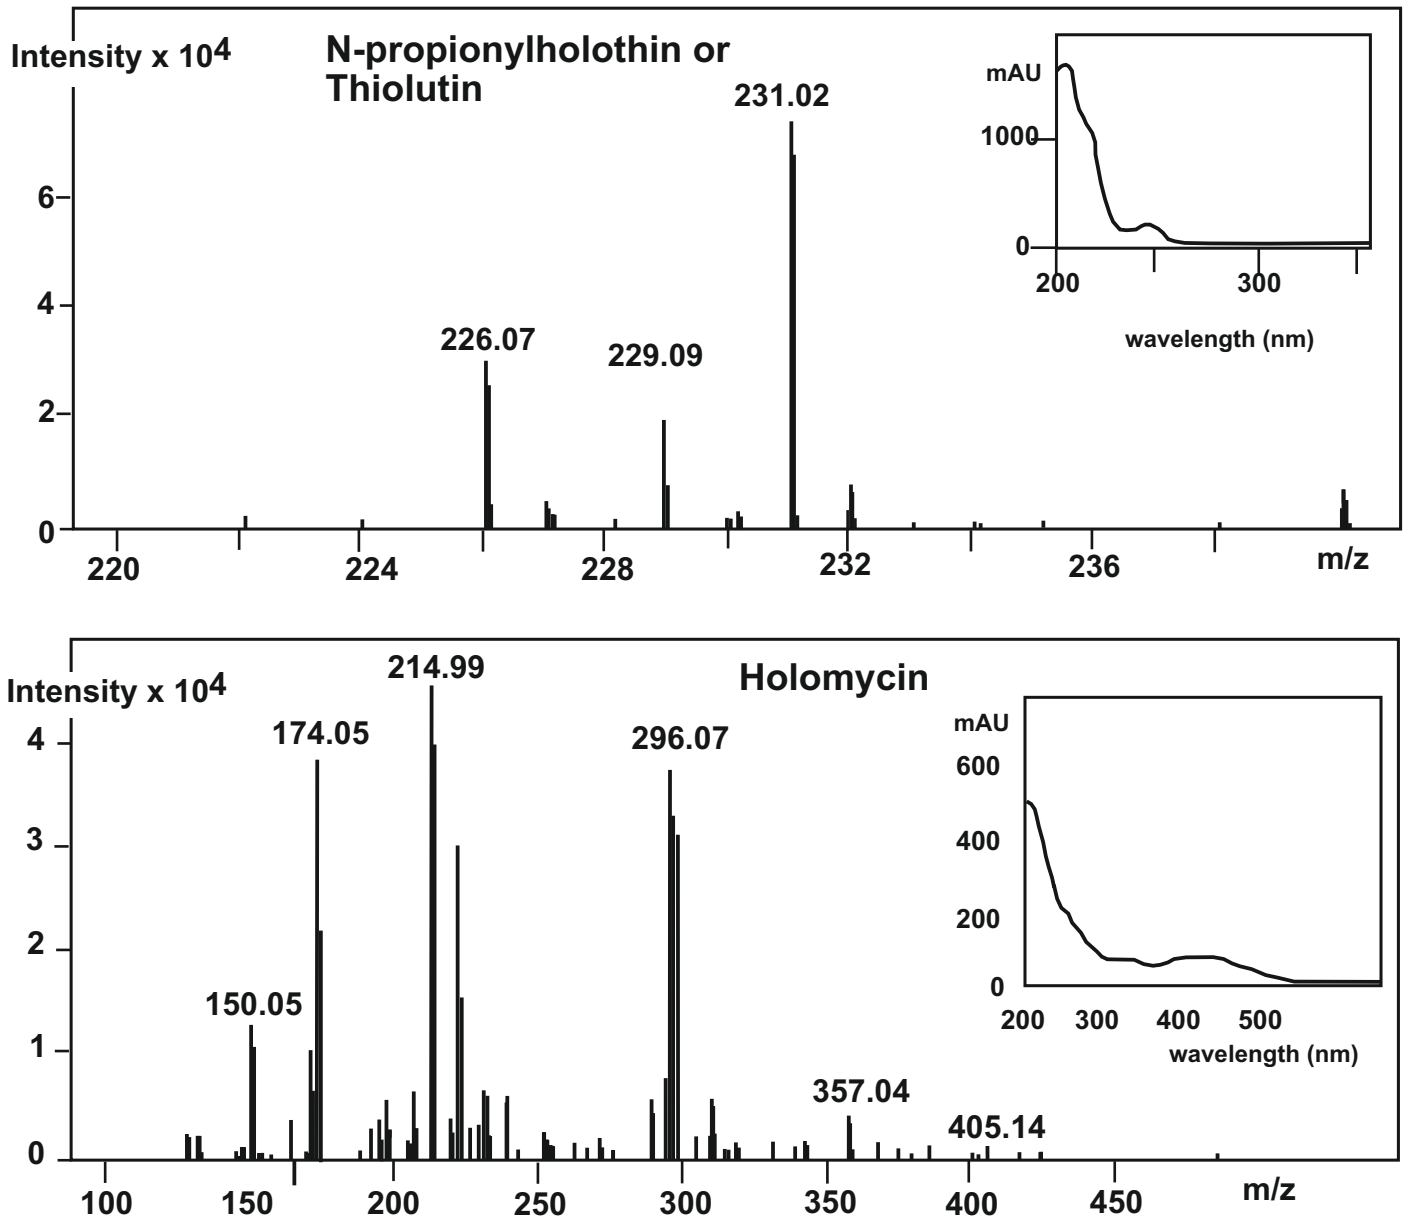

Fig. S4. MS and UV absorption spectra of the new compounds detected in *S. clavuligerus* ATCC 27064 and the pSCL4<sup>-</sup> mutant (see Fig. 6). Only holomycin and N-propionylholothin have been described previously to be produced by *S. clavuligerus* strains.



Figure S5. Methionine and Cysteine Metabolism in *S. clavuligerus* pSCL4

| A. Transcriptomic of Methionine and Cysteine metabolism genes |              |                                                  |        |        |       |                      |                      |                      |                             |        |       |
|---------------------------------------------------------------|--------------|--------------------------------------------------|--------|--------|-------|----------------------|----------------------|----------------------|-----------------------------|--------|-------|
| Gene                                                          | SCLAV        | Product                                          | Mc     |        |       | BH                   |                      |                      | Change of expression (fold) |        |       |
|                                                               |              |                                                  | 22.5 h | 46.5 h | 60 h  | 22.5 h               | 46.5 h               | 60 h                 | 22.5 h                      | 46.5 h | 60 h  |
| <i>metK</i>                                                   | SCLAV_0705   | S-adenosylmethionine synthetase                  | 0.75   | 0.81   | 0.91  | 3.48E <sup>-02</sup> | 1.71E <sup>-02</sup> | 6.33E <sup>-03</sup> | 1.68                        | 1.75   | 1.88  |
| <i>metH</i>                                                   | SCLAV_0875   | Methionine synthase                              | 3.04   | 3.60   | 4.73  | 3.35E <sup>-04</sup> | 3.62E <sup>-05</sup> | 8.99E <sup>-07</sup> | 8.24                        | 12.14  | 26.59 |
| <i>sahH</i>                                                   | SCLAV_2107   | Adenosylhomocysteinase                           | 2.67   | 2.79   | 3.16  | 1.33E <sup>-04</sup> | 5.68E <sup>-05</sup> | 9.45E <sup>-06</sup> | 6.37                        | 6.93   | 8.93  |
|                                                               | SCLAV_2199   | Cystathionine beta-synthase                      | -0.52  | -0.40  | 0.66  | 1.50E <sup>-01</sup> | 2.53E <sup>-01</sup> | 4.16E <sup>-02</sup> | 0.70                        | 0.76   | 1.58  |
| <i>cysA</i>                                                   | SCLAV_2869   | Cystathionine gamma-lyase                        | 0.13   | 0.10   | 0.34  | 7.73E <sup>-01</sup> | 8.01E <sup>-01</sup> | 3.01E <sup>-01</sup> | 1.10                        | 1.07   | 1.26  |
| <i>metB</i>                                                   | SCLAV_3851   | Cystathionine gamma-synthase                     | -0.33  | 0.07   | 0.91  | 3.64E <sup>-01</sup> | 8.33E <sup>-01</sup> | 1.42E <sup>-03</sup> | 0.79                        | 1.05   | 1.88  |
| <i>metX</i>                                                   | SCLAV_5558** | Homoserine O-acetyltransferase                   | -6.40  | -6.73  | -3.78 | 3.71E <sup>-05</sup> | 1.40E <sup>-05</sup> | 3.94E <sup>-03</sup> | 0.01                        | 0.01   | 0.07  |
|                                                               | SCLAV_5559** | O-acetylhomoserine aminocarboxypropyltransferase | -8.98  | -9.53  | -5.89 | 1.80E <sup>-05</sup> | 5.69E <sup>-06</sup> | 7.35E <sup>-04</sup> | 0.00                        | 0.00   | 0.02  |
| <i>metE</i>                                                   | SCLAV_p0930* | Homocysteine methyltransferase B12-dependet      | Absent |        |       |                      |                      |                      |                             |        |       |
| <i>cysK</i>                                                   | SCLAV_0274   | Cysteine synthase/cystathionine beta-synthase    | 1.76   | 1.88   | 1.23  | 7.00E <sup>-04</sup> | 2.60E <sup>-04</sup> | 8.77E <sup>-03</sup> | 3.40                        | 3.68   | 2.35  |
|                                                               | SCLAV_2020   | Cysteine synthase                                | -0.74  | -0.15  | 1.27  | 1.17E <sup>-02</sup> | 6.50E <sup>-01</sup> | 3.59E <sup>-05</sup> | 0.60                        | 0.90   | 2.42  |
|                                                               | SCLAV_4724   | Putative cysteine synthase                       | 1.71   | 3.89   | 4.30  | 1.75E <sup>-02</sup> | 4.95E <sup>-06</sup> | 6.77E <sup>-07</sup> | 3.26                        | 14.79  | 19.67 |
|                                                               | SCLAV_5668** | Cystathionine gamma-synthase                     | -3.17  | -3.14  | -3.78 | 2.31E <sup>-04</sup> | 1.86E <sup>-04</sup> | 1.55E <sup>-05</sup> | 0.11                        | 0.11   | 0.07  |
|                                                               | SCLAV_5714** | Cysteine desulfurase                             | -3.39  | -3.50  | -3.12 | 1.16E <sup>-05</sup> | 4.11E <sup>-06</sup> | 6.90E <sup>-06</sup> | 0.10                        | 0.09   | 0.11  |
|                                                               | SCLAV_p0023* | Cysteine desulfurase, SufS subfamily             | Absent |        |       |                      |                      |                      |                             |        |       |
|                                                               | SCLAV_p1477* | Cysteine synthase                                | Absent |        |       |                      |                      |                      |                             |        |       |

Fg S5 B

S5-B. Methionine and cysteine metabolism in *S. clavuligerus*

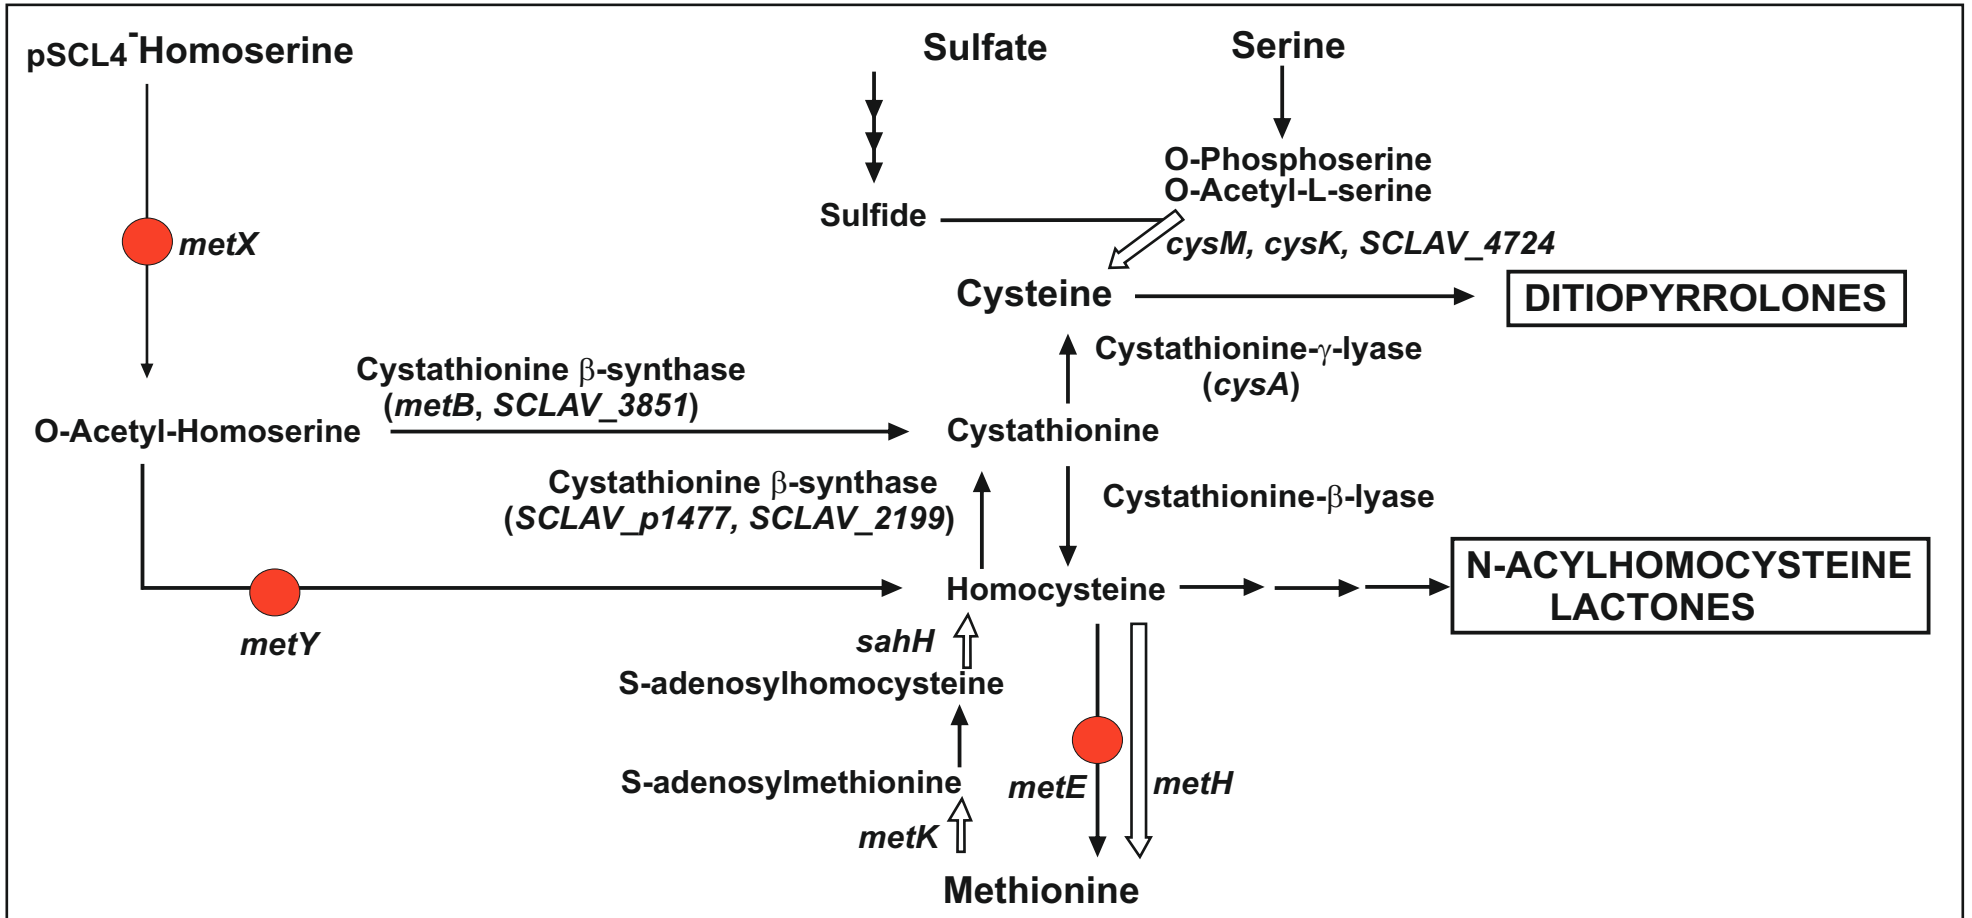

**Figure S5. Transcriptomic data of Methionine and Cysteine Metabolism Genes.** A) Change of expression level of genes related to methionine or cysteine metabolism in *S. clavuligerus* pSCL4-. Genes not present in *S. clavuligerus* pSCL4- since they are in the megaplasmid are indicated with double asterisk (\*\*); those genes present among the 231 CDS absent at the right arm of the chromosome are indicated with single asterisk (\*). B) Pathways of methionine and cysteine metabolism in *Streptomyces*. Open arrows indicated upregulated genes in the pSCL4-minus strain. Steps carried by enzymes encoded by genes not present are marked with a black circle.

**Table S1. Effect of lack of pSCL4- in genes involved in cell envelope formation and morphological differentiation.**

| SCLAV                | Product                                      | $M_c$  |        |       | BH-corrected <i>P</i> value |                      |                      | Fold change |        |       |
|----------------------|----------------------------------------------|--------|--------|-------|-----------------------------|----------------------|----------------------|-------------|--------|-------|
|                      |                                              | 22.5 h | 46.5 h | 60 h  | 22.5 h                      | 46.5 h               | 60 h                 | 22.5 h      | 46.5 h | 60 h  |
| <b>Overexpressed</b> |                                              |        |        |       |                             |                      |                      |             |        |       |
| SCLAV_0315           | UDP-N-acetylglucosamine 2-epimerase          | 2.67   | 2.31   | 1.54  | 2.31E <sup>-05</sup>        | 6.90E <sup>-05</sup> | 3.07E <sup>-03</sup> | 6.35        | 4.97   | 2.91  |
| SCLAV_0316           | Putative N-acetyl-glucosamine transferase    | 2.04   | 2.11   | 2.51  | 5.47E <sup>-04</sup>        | 2.73E <sup>-04</sup> | 2.68E <sup>-05</sup> | 4.11        | 4.33   | 5.71  |
| SCLAV_0874           | Transferase                                  | 1.03   | 1.10   | 2.26  | 1.43E <sup>-02</sup>        | 6.49E <sup>-03</sup> | 2.50E <sup>-06</sup> | 2.04        | 2.15   | 4.80  |
| SCLAV_1824           | MscS mechanosensitive ion channel            | 1.48   | 1.77   | 2.49  | 5.45E <sup>-04</sup>        | 5.57E <sup>-05</sup> | 6.12E <sup>-07</sup> | 2.80        | 3.41   | 5.60  |
| SCLAV_3942           | Putative penicillin-binding protein          | 1.87   | 1.84   | 2.15  | 6.71E <sup>-04</sup>        | 5.79E <sup>-04</sup> | 8.07E <sup>-05</sup> | 3.67        | 3.59   | 4.42  |
| SCLAV_4710           | Peptidase                                    | 1.69   | 2.43   | 3.52  | 2.02E <sup>-03</sup>        | 3.11E <sup>-05</sup> | 1.84E <sup>-07</sup> | 3.22        | 5.38   | 11.50 |
| SCLAV_5204           | Putative SsgD protein                        | 2.35   | 2.73   | 2.60  | 6.73E <sup>-06</sup>        | 1.22E <sup>-06</sup> | 2.42E <sup>-07</sup> | 5.10        | 6.66   | 6.04  |
| <b>Downexpressed</b> |                                              |        |        |       |                             |                      |                      |             |        |       |
| SCLAV_0202           | Putative non-hemolytic phospholipase C       | -1.33  | -1.82  | -1.80 | 1.80E <sup>-04</sup>        | 4.70E <sup>-06</sup> | 2.43E <sup>-06</sup> | 0.40        | 0.28   | 0.29  |
| SCLAV_2383           | Putative penicillin-binding exported protein | -1.47  | -2.08  | -2.64 | 1.59E <sup>-04</sup>        | 3.80E <sup>-06</sup> | 4.65E <sup>-08</sup> | 0.36        | 0.24   | 0.16  |
| SCLAV_3211           | NLP/P60-family secreted protein              | -1.01  | -1.27  | -2.01 | 6.25E <sup>-04</sup>        | 3.51E <sup>-05</sup> | 6.71E <sup>-08</sup> | 0.50        | 0.41   | 0.25  |
| SCLAV_3779           | Lipoprotein                                  | -1.25  | -2.00  | -2.03 | 1.05E <sup>-03</sup>        | 4.97E <sup>-06</sup> | 2.05E <sup>-06</sup> | 0.42        | 0.25   | 0.24  |
| SCLAV_3924           | Putative secreted protein                    | -2.14  | -2.99  | -2.82 | 1.94E <sup>-03</sup>        | 3.97E <sup>-05</sup> | 5.56E <sup>-05</sup> | 0.23        | 0.13   | 0.14  |
| SCLAV_4356           | Cell division-related protein                | -1.37  | -1.84  | -1.96 | 1.05E <sup>-04</sup>        | 5.03E <sup>-06</sup> | 6.77E <sup>-07</sup> | 0.39        | 0.28   | 0.26  |
| SCLAV_4765           | Amino-transferase                            | -2.76  | -3.00  | -3.46 | 2.91E <sup>-04</sup>        | 8.20E <sup>-05</sup> | 1.12E <sup>-05</sup> | 0.15        | 0.12   | 0.09  |
| SCLAV_4953           | AmfT protein                                 | -1.13  | -2.11  | -0.44 | 1.30E <sup>-01</sup>        | 3.60E <sup>-03</sup> | 5.88E <sup>-01</sup> | 0.46        | 0.23   | 0.74  |
| SCLAV_4954           | Membrane translocator, AmfB                  | -0.34  | -0.88  | -0.25 | 6.33E <sup>-01</sup>        | 1.01E <sup>-01</sup> | 7.01E <sup>-01</sup> | 0.79        | 0.54   | 0.84  |
| SCLAV_4955           | Membrane translocator, AmfA                  | -0.66  | -1.56  | 0.33  | 1.70E <sup>-01</sup>        | 7.37E <sup>-04</sup> | 5.04E <sup>-01</sup> | 0.63        | 0.34   | 1.26  |
| SCLAV_4956           | Transcriptional regulator, AmfR              | -0.81  | -1.28  | -1.13 | 9.28E <sup>-02</sup>        | 4.92E <sup>-03</sup> | 9.98E <sup>-03</sup> | 0.57        | 0.41   | 0.46  |

|            |                                              |       |       |       |                      |                      |                      |      |      |      |
|------------|----------------------------------------------|-------|-------|-------|----------------------|----------------------|----------------------|------|------|------|
| SCLAV_5096 | Putative SsgD protein                        | -1.36 | -1.23 | -1.13 | 1.93E <sup>-03</sup> | 3.34E <sup>-03</sup> | 5.42E <sup>-03</sup> | 0.39 | 0.43 | 0.46 |
| SCLAV_5177 | Secreted protein                             | -3.40 | -4.31 | -6.18 | 1.40E <sup>-03</sup> | 8.34E <sup>-05</sup> | 7.24E <sup>-07</sup> | 0.10 | 0.05 | 0.01 |
| SCLAV_5178 | Hypothetical protein                         | -2.97 | -3.71 | -5.62 | 3.26E <sup>-03</sup> | 2.71E <sup>-04</sup> | 1.46E <sup>-06</sup> | 0.13 | 0.08 | 0.02 |
| SCLAV_5179 | Putative secreted protein                    | -2.59 | -3.68 | -4.77 | 1.26E <sup>-03</sup> | 2.05E <sup>-05</sup> | 5.48E <sup>-07</sup> | 0.17 | 0.08 | 0.04 |
| SCLAV_5180 | Putative secreted protein                    | -2.31 | -2.80 | -2.98 | 5.33E <sup>-04</sup> | 4.34E <sup>-05</sup> | 1.48E <sup>-05</sup> | 0.20 | 0.14 | 0.13 |
| SCLAV_5181 | Putative ABC transporter ATP-binding protein | -2.54 | -2.57 | -2.70 | 8.28E <sup>-05</sup> | 5.17E <sup>-05</sup> | 2.01E <sup>-05</sup> | 0.17 | 0.17 | 0.15 |
| SCLAV_5182 | Putative YrbE family protein                 | -2.12 | -2.65 | -1.54 | 1.13E <sup>-02</sup> | 1.38E <sup>-03</sup> | 4.84E <sup>-02</sup> | 0.23 | 0.16 | 0.34 |
| SCLAV_5183 | ABC-transporter integral membrane protein    | -2.25 | -2.84 | -2.59 | 6.82E <sup>-04</sup> | 3.71E <sup>-05</sup> | 7.47E <sup>-05</sup> | 0.21 | 0.14 | 0.17 |
| SCLAV_5184 | Secreted protein                             | -2.44 | -3.07 | -2.14 | 3.79E <sup>-05</sup> | 3.46E <sup>-06</sup> | 7.95E <sup>-05</sup> | 0.18 | 0.12 | 0.23 |
| SCLAV_5185 | Putative Mce family protein                  | -2.64 | -3.32 | -3.47 | 6.18E <sup>-04</sup> | 3.42E <sup>-05</sup> | 1.43E <sup>-05</sup> | 0.16 | 0.10 | 0.09 |
| SCLAV_5186 | Secreted protein                             | -2.12 | -2.76 | -2.35 | 3.32E <sup>-04</sup> | 1.20E <sup>-05</sup> | 5.20E <sup>-05</sup> | 0.23 | 0.15 | 0.20 |
| SCLAV_5187 | Secreted protein                             | -2.60 | -3.05 | -3.04 | 5.48E <sup>-05</sup> | 1.57E <sup>-05</sup> | 3.96E <sup>-06</sup> | 0.17 | 0.12 | 0.12 |
| SCLAV_5188 | Secreted protein                             | -2.36 | -2.82 | -2.70 | 5.22E <sup>-04</sup> | 5.08E <sup>-05</sup> | 6.08E <sup>-05</sup> | 0.20 | 0.14 | 0.15 |
| SCLAV_5189 | Putative Mce family protein                  | -2.36 | -3.11 | -2.95 | 2.32E <sup>-04</sup> | 7.51E <sup>-06</sup> | 8.87E <sup>-06</sup> | 0.19 | 0.12 | 0.13 |
| SCLAV_5192 | Putative membrane protein                    | -2.75 | -3.45 | -3.55 | 1.51E <sup>-04</sup> | 8.68E <sup>-06</sup> | 3.75E <sup>-06</sup> | 0.15 | 0.09 | 0.09 |

**Table S2. Oligonucleotides used in this work**

| <b>Oligonucleotide Name</b>                                  | <b>Sequence (5' to 3')</b> | <b>Annealing Temperature (°C)</b> |
|--------------------------------------------------------------|----------------------------|-----------------------------------|
| <b>a) Used for microarrays validation by RT-qPCR</b>         |                            |                                   |
| SCLAV_0014_F                                                 | CGGCTGTGGGAACTCGTC         | 62                                |
| SCLAV_0014_R                                                 | GTCGGGGTCGGGGTGGT          | 62                                |
| SCLAV_0785_F                                                 | CGGCAAGTCCTCCCTCAT         | 62                                |
| SCLAV_0785_R                                                 | ACAGGTTGAAGTGCTGGAAG       | 62                                |
| SCLAV_3410_F                                                 | GGCGGTGGAGCATGTGG          | 64                                |
| SCLAV_3410_R                                                 | GCGACCCAGAGGTGGAG          | 64                                |
| SCLAV_4035_F                                                 | GGAAGGGCAAGGACAAGAG        | 62                                |
| SCLAV_4035_R                                                 | GTGGCGAGGTAGGGGAAC         | 62                                |
| SCLAV_4464_F                                                 | CGCCGATGTCCTGCTGAC         | 66                                |
| SCLAV_4464_R                                                 | AGAACGGGGGTGTGCTC          | 66                                |
| SCLAV_4484_F                                                 | CGCACTTCGCCTACGAC          | 62                                |
| SCLAV_4484_R                                                 | GCGGATTCTCACGGTTGTTC       | 62                                |
| SCLAV_4650_F                                                 | CGGCATCGAGGAGATGAG         | 62                                |
| SCLAV_4650_R                                                 | AGGGGTAGAGGGTGGCGTA        | 62                                |
| SCLAV_5491_F                                                 | CGGCTACGACGATGTGC          | 64                                |
| SCLAV_5491_R                                                 | GAACCCCTTGGACACGAG         | 64                                |
| SCLAV_5580_F                                                 | GCAGCAGTGTGGAGTGGA         | 62                                |
| SCLAV_5580_R                                                 | GGCGGTTGACGGTGGTG          | 62                                |
| <b>b) Used for the analysis of the right chromosomal arm</b> |                            |                                   |
| SCLAV_5146_F                                                 | GCTGAAGAACCCCGAAGAC        | 58                                |
| SCLAV_5146_R                                                 | CGTGTTGACGCTGTTGGTG        | 58                                |
| SCLAV_5308_F                                                 | TTCGGAGAGCAGTTGGAGTT       | 64                                |
| SCLAV_5308_R                                                 | AACAGAGCAGCGGACCAG         | 64                                |
| SCLAV_5482_F                                                 | CCAGAGCCATCGGAGAAGAT       | 60                                |
| SCLAV_5482_R                                                 | GGACACCAGCCCCAAT           | 60                                |

|                  |                       |    |
|------------------|-----------------------|----|
| SCLAV_5485_F     | GCTGAACGGCTACGAGACC   | 60 |
| SCLAV_5485_R     | CAGATAGAGCGAGCAGAGTCC | 60 |
| SCLAV_5487_F     | GAGAGCGGTGAGGGAGGA    | 60 |
| SCLAV_5487_R     | CTGGTGTGCTGCCCCGTA    | 60 |
| SCLAV_5491_F     | CGGCTACGACGATGTGC     | 64 |
| SCLAV_5491_R     | GAACCCCTTGGACACGAG    | 64 |
| SCLAV_5487_F*    | GGTGTACGGGTGCTCGTC    | 60 |
| SCLAV_5487_R*    | CCTCCACGAGGAAGTGACC   | 60 |
| SCLAV_5488_F     | GAAAGAAAGATGCCGGACAC  | 64 |
| SCLAV_5488_R     | AGATCCAGGTCCTTGCACAT  | 66 |
| SCLAV_5488_F*    | ATGTGCAAGGACCTGGATCT  | 66 |
| SCLAV_5490_R*    | TGTCCCTTGGAGAGGATCAG  | 66 |
| SCLAV_5489_F     | AGGACCGTCGCGGTGAAC    | 68 |
| SCLAV_5490_F     | ATCTGCGCTACGACTTCGAC  | 61 |
| SCLAV_5490_R     | CTGTTCCGGGATGTAGCACT  | 61 |
| SCLAV_5491_F*    | TACTGCCCTTCGACTATGC   | 62 |
| SCLAV_5491_R*    | GTTGGCGGTCAGATAGGAGA  | 62 |
| SCLAV_5521_F     | AGAGCTGGAGGCCGAAGT    | 60 |
| SCLAV_5521_R     | CCGGGTGAGGATGGTGAT    | 60 |
| SCLAV_5580_F     | GCAGCAGTGTGGAGTGGA    | 62 |
| SCLAV_5580_R     | GGCGGTTGACGGTGGTG     | 62 |
| SCLAV_5585_F     | TCAACGAGGTCTTCCTCACC  | 60 |
| SCLAV_5585_R     | CGTTCATCAGGGTGGTCCT   | 60 |
| SCLAV_5692_F     | CGCTGTACCTCACCCATC    | 64 |
| SCLAV_5692_R     | GTGGCCGAGCAGGATCT     | 64 |
| SCLAV_5719_F     | CCAACACCGACCAGAACG    | 58 |
| SCLAV_5719_R     | CGAGGAAGGGCAAGCAGT    | 58 |
| Right Telomere_F | CACTGCTTGCCCTTCCTC    | 64 |
| Right Telomere_R | AGCCACATTTGCCCATACAC  | 64 |
